# Supplementary material for: Amphiphilic polyethylenimine (PEI) as highly efficient non-viral gene carrier
Source: Royal Society of Chemistry journal article supplement (doi:10.1039/c3ob42279h), 2013-12-16
Supplement: c3ob42279h.pdf [file c3ob42279h.pdf]

## Supporting Information

### Amphiphilic Polyethylenimine (PEI) as High efficient non-viral gene carrier

Xibo Yan<sup>2,3†</sup>, Yue Zhang<sup>1†</sup>, Hongbo Zhang<sup>2</sup>, Peng George Wang<sup>2,3</sup>, Xiaogang Chu<sup>1</sup>, Xin Wang<sup>2,3\*</sup>

<sup>1</sup>*Institute of Food Safety, Chinese Academy of Inspection and Quarantine(CAIQ)  
A3 Gaobeidian North Road, Chaoyang District, Beijing, 100123, P.R.China*

<sup>2</sup>*College of Pharmacy, Nankai University*

<sup>3</sup>*State Key Laboratory of Element-Organic Chemistry, Nankai University  
94 Weijin Road, Nankai District, Tianjin 300071, P.R.China*

## Content

|                              |          |
|------------------------------|----------|
| <b>A. NMR Spectrum</b>       | <b>2</b> |
| <b>B. Cytotoxicity Study</b> | <b>8</b> |

## A. NMR Spectrum

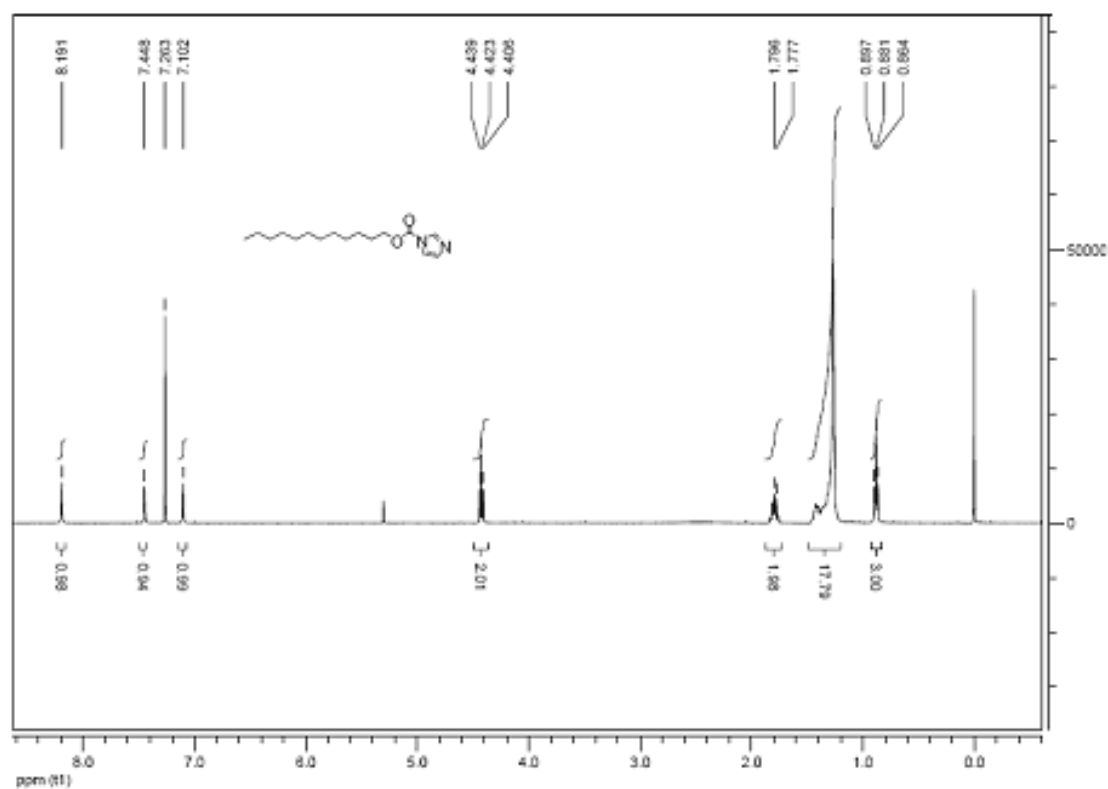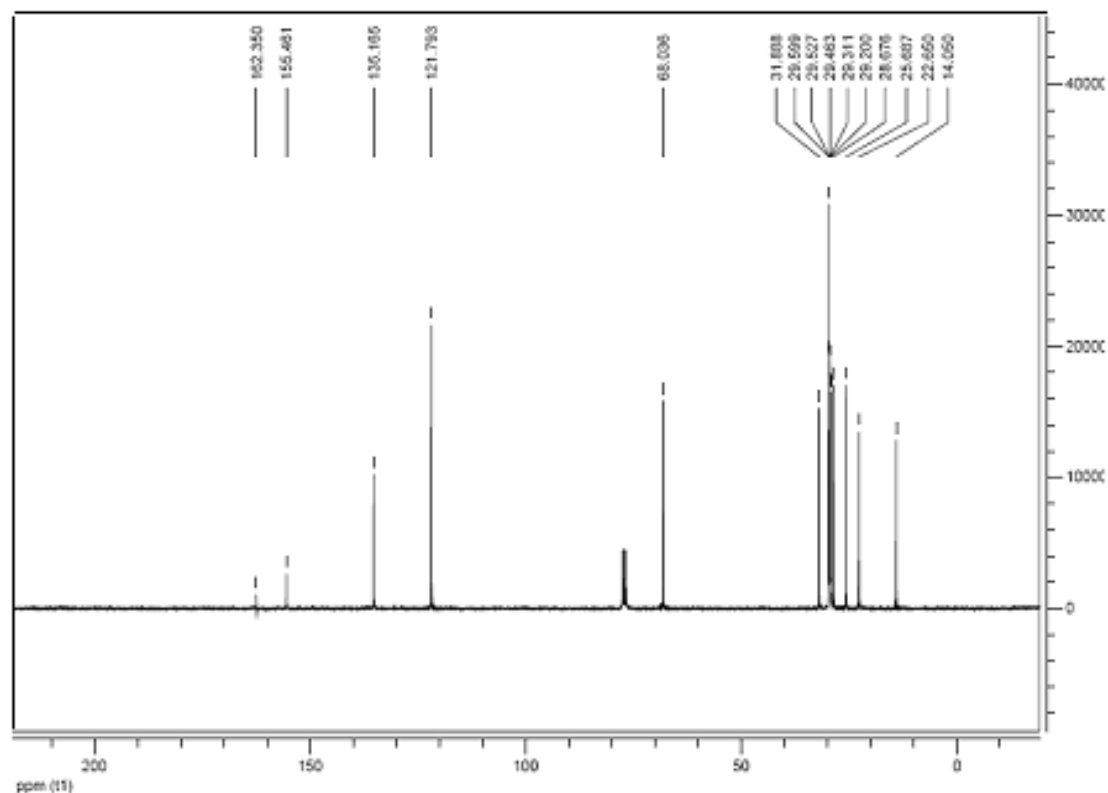

**Fig S1** <sup>1</sup>H NMR and <sup>13</sup>C NMR of LD-CDI (1)

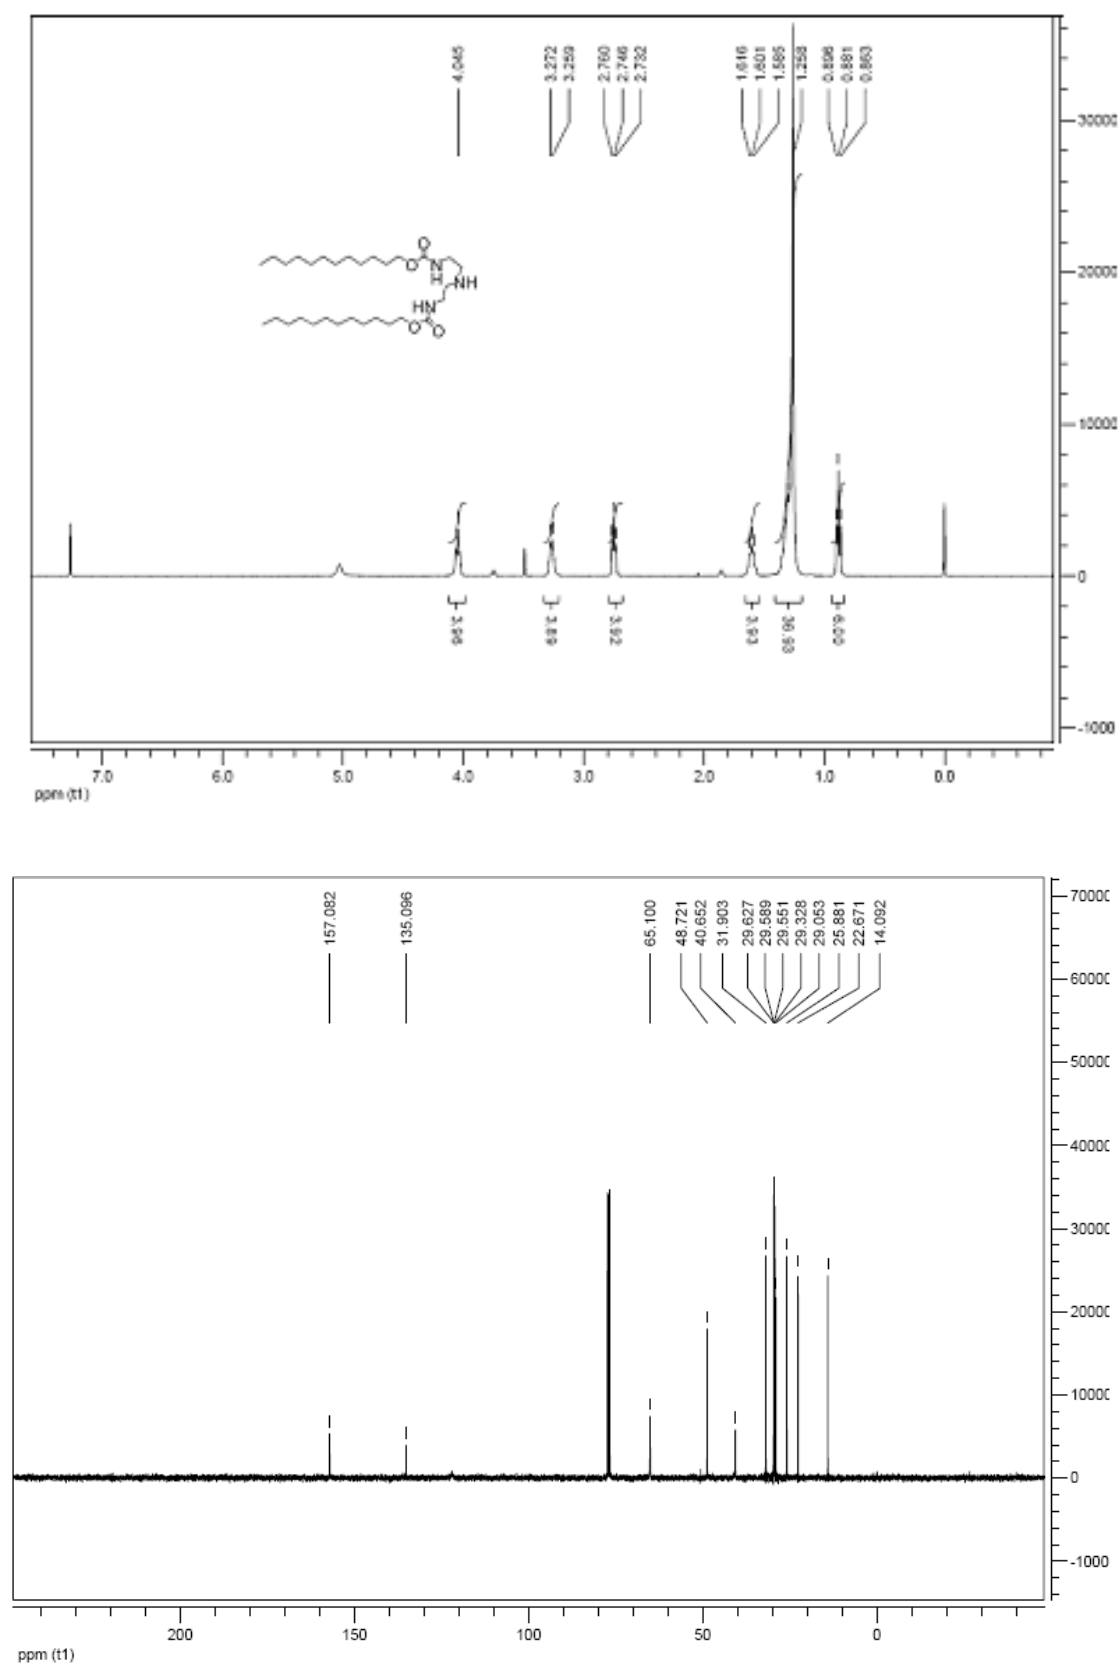

**Fig S2**  $^1\text{H}$  NMR and  $^{13}\text{C}$  NMR of LD0 (2)

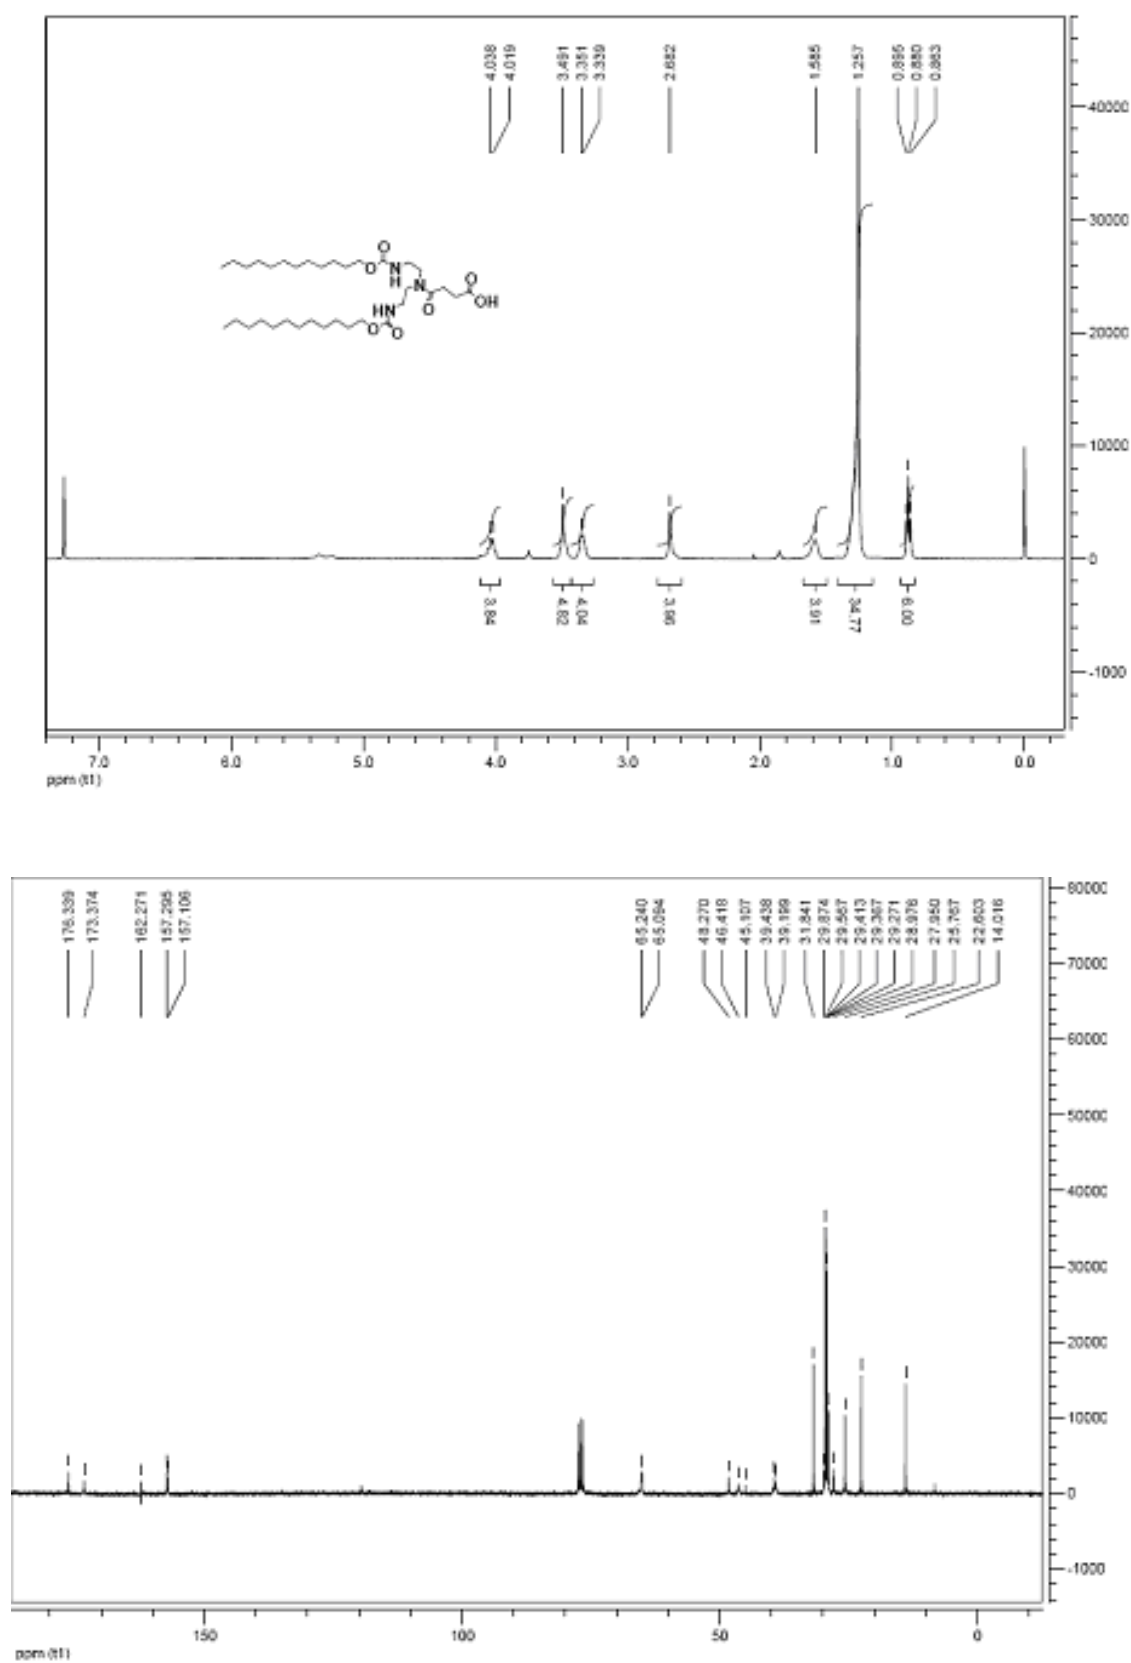

**Fig S3** <sup>1</sup>H NMR and <sup>13</sup>C NMR of LD0-COOH (3)

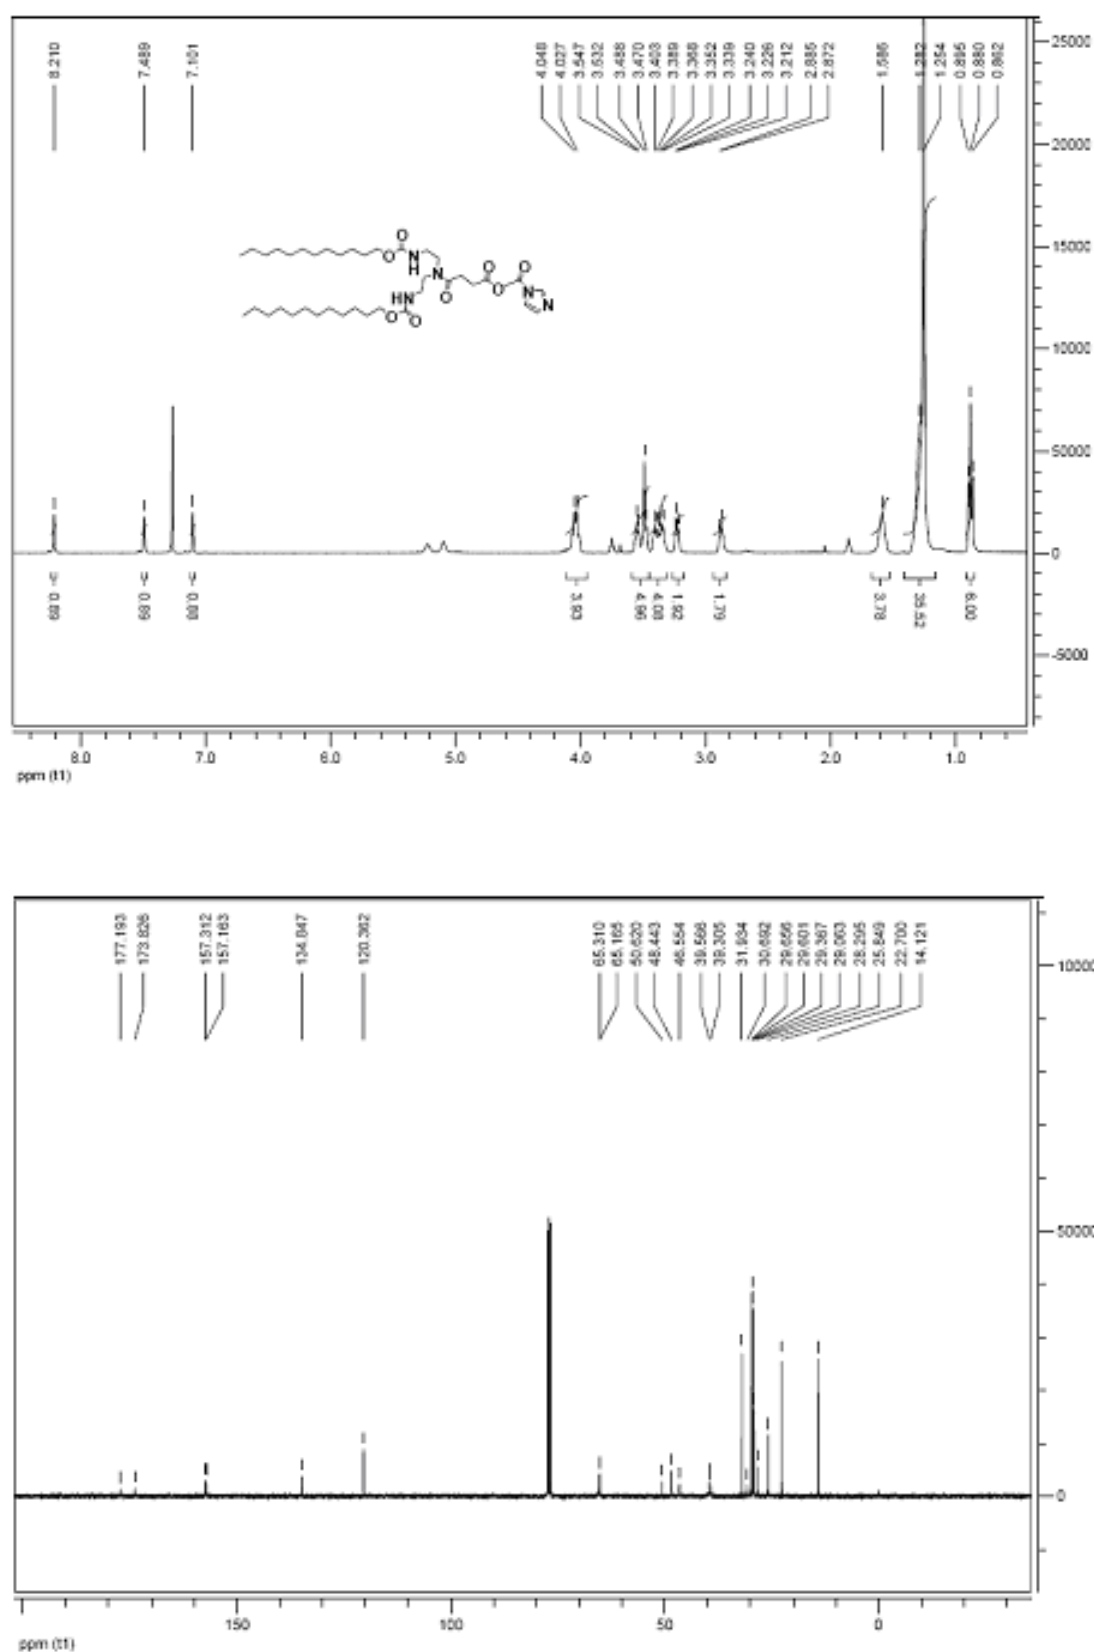

Fig S4 <sup>1</sup>H NMR and <sup>13</sup>C NMR of LD0-CDI (4)

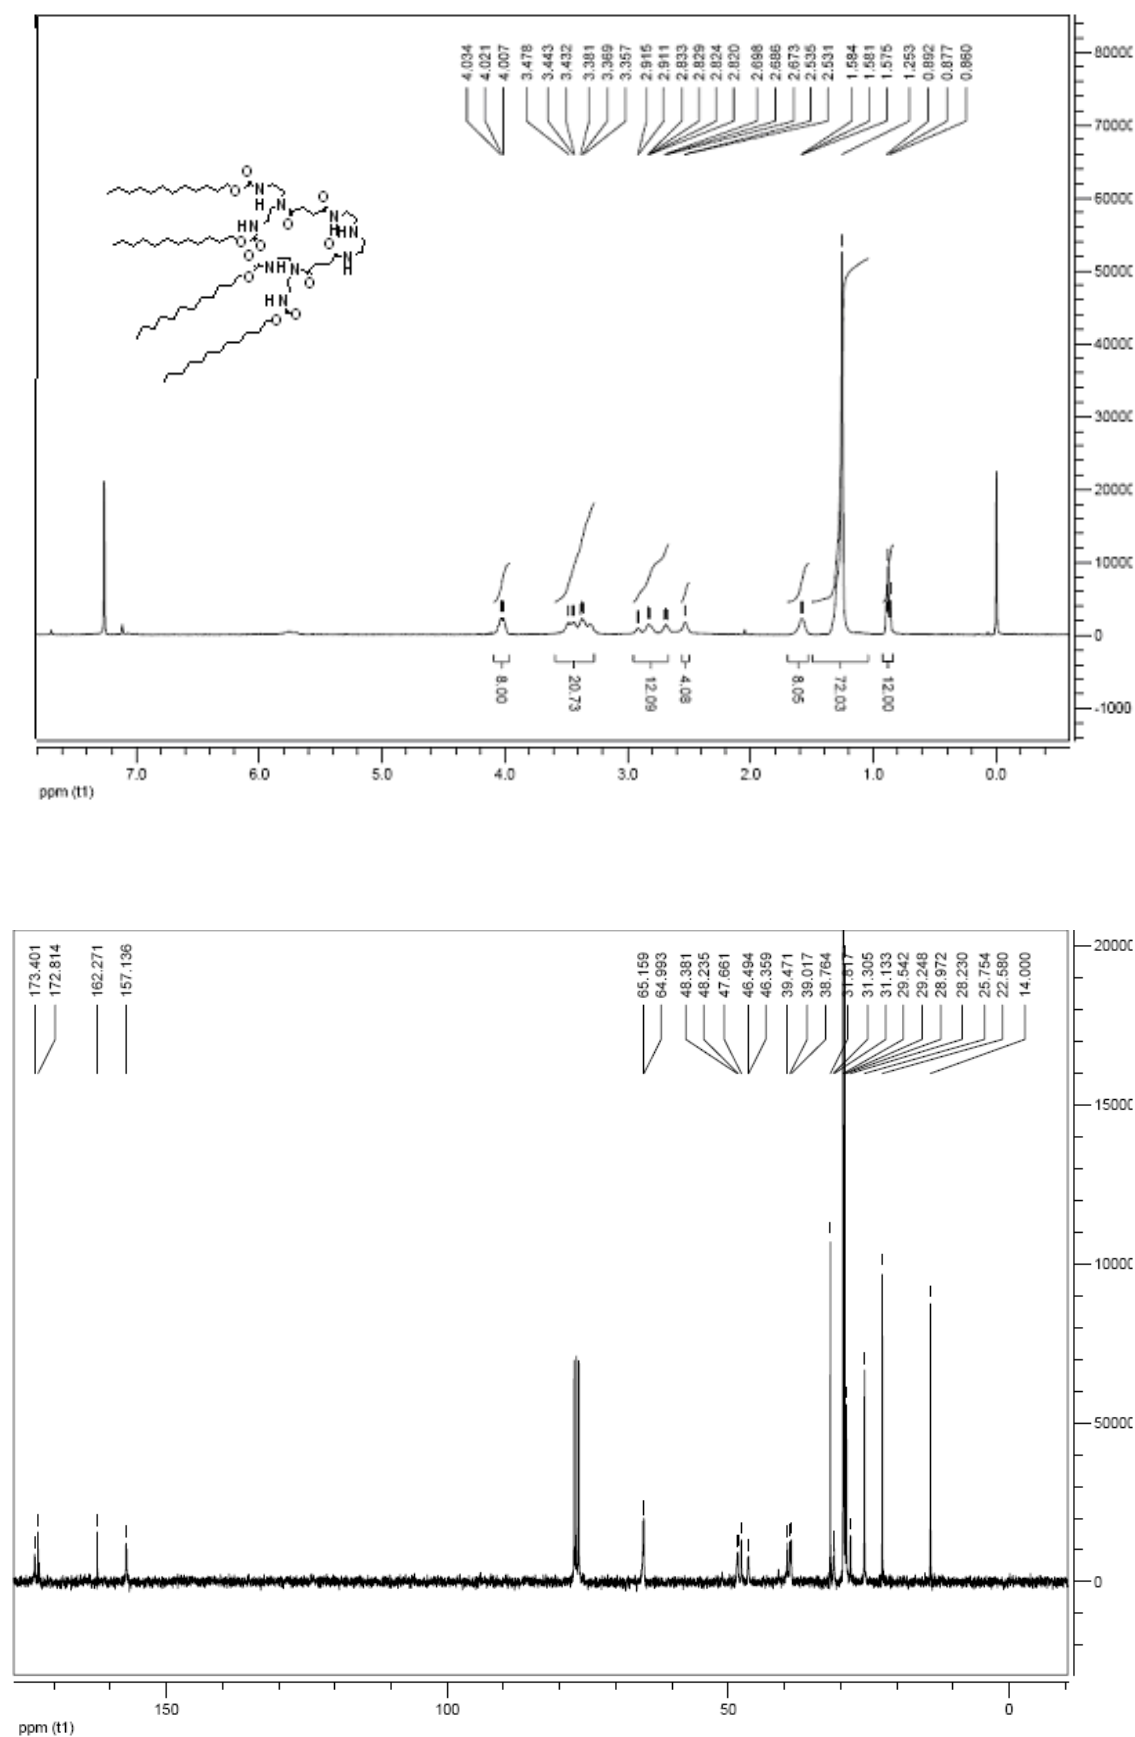

Fig S5 <sup>1</sup>H NMR and <sup>13</sup>C NMR of LD1 (5)

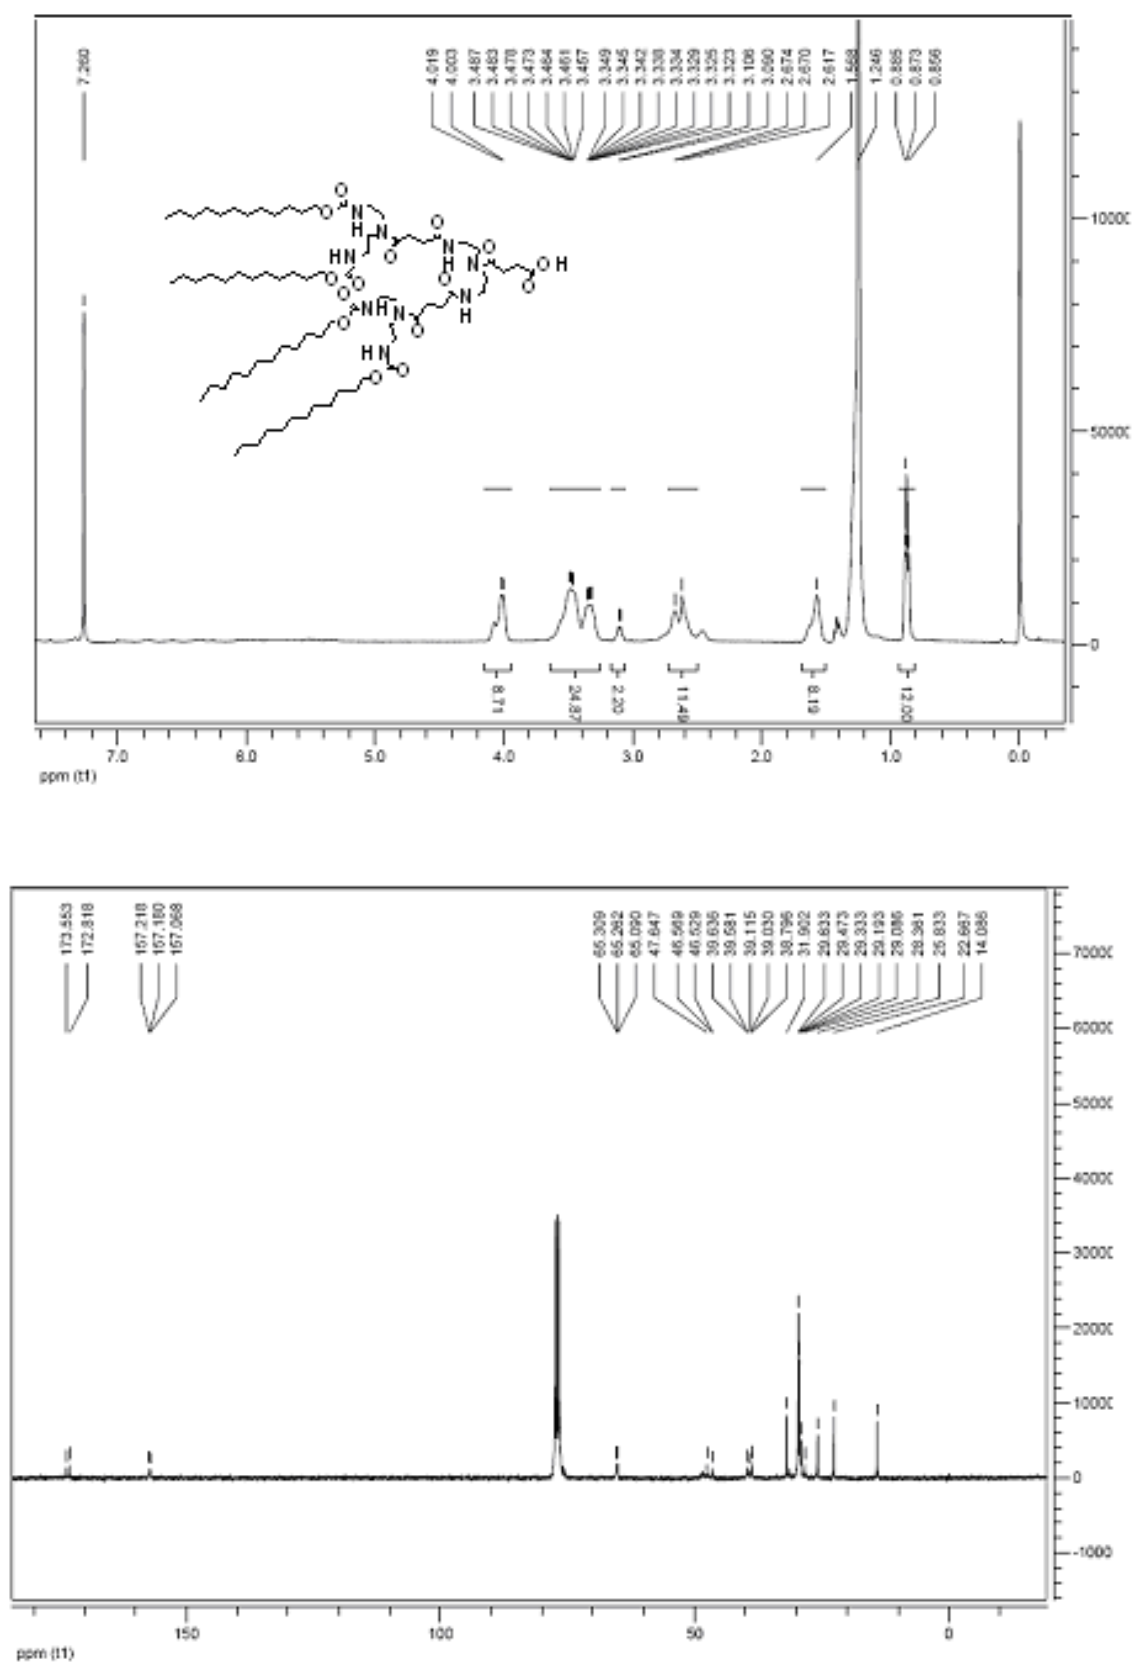

Fig S6 <sup>1</sup>H NMR and <sup>13</sup>C NMR of LD1-COOH (6)

**Cytotoxicity study:** The cytotoxicity of LD1-PEI was evaluated by MTT assay. NIH 3T3 cells (a kind of normal mouse fibroblast cell lines) were seeded in 96-well plate at a density of  $1 \times 10^4$  cells per well. After 24 h, the culture medium was replaced with 100  $\mu$ L fresh DMEM containing various concentrations of LD1-PEI or PEI, and the mixture was further incubated for 24 h. Fresh culture medium without samples was used as control. Each concentration was replicated in six wells. After an additional 24 h, the mixture was replaced with 100  $\mu$ L fresh DMEM, and 20  $\mu$ L MTS was added to each well, then the cells were incubated further for 1 h. The optical density (OD) was then measured at 490 nm on an ascent plate reader. The optical Cell viability (%) =  $(OD_{\text{sample}}/OD_{\text{control}}) \times 100\%$ .

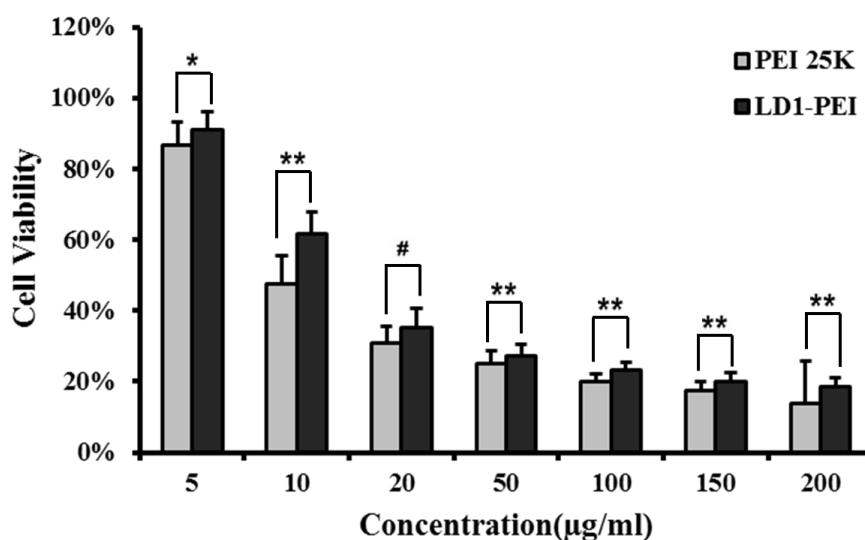

**Fig S7** Cytotoxicity of LD1-PEI and PEI at various concentrations on NIH 3T3 cell lines, the concentration was 0, 5, 10, 50, 100, 150 and 200  $\mu$ g/mL respectively. Error bars represent standard deviations. ( $n=6$ , \*\*  $p<0.01$ , \*  $p<0.05$ , #  $p>0.05$ )
